# Supplementary material for: One-dimensional coordination polymers of antiferromagnetically-coupled [Mn4] single-molecule magnets
Source: Royal Society of Chemistry journal article supplement (doi:10.1039/b715528j), 2007-12-13
Supplement: b715528j.pdf [file b715528j.pdf]

# Supporting Information

## One-dimensional coordination polymers of antiferromagnetically-coupled [Mn<sub>4</sub>] Single-Molecule Magnets

Lollita Lecren, Olivier Roubeau, Yang-Guang Li, Xavier Le Goff, Hitoshi Miyasaka, Florent Richard, Wolfgang Wernsdorfer, Claude Coulon, and Rodolphe Clérac

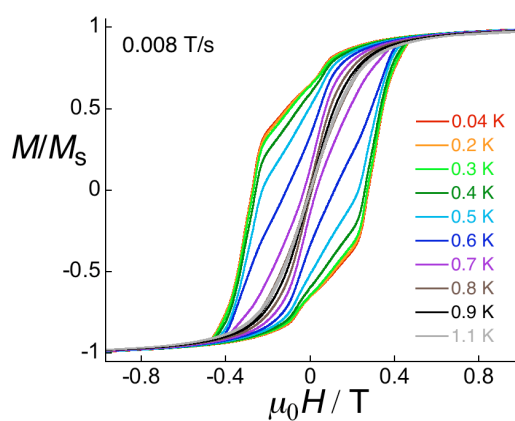

**Figure S1.**  $M$  vs.  $H$  hysteresis loops measured on an oriented single crystal of **3** at different temperatures with a field sweep rate of 0.008 T/s. The applied field is here oriented in the average easy direction of the single crystal. The data are normalized to the saturation magnetization ( $M_S$ ) at 1.4 T.

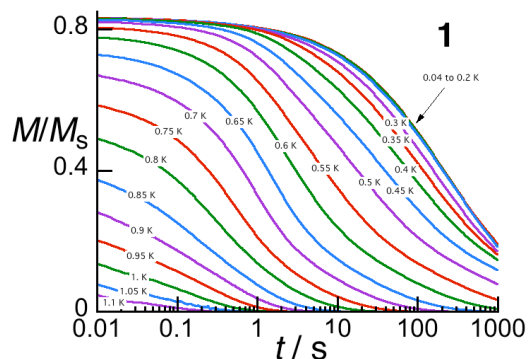

**Figure S2.** Relaxation of the magnetization of **1** at different temperatures. Data are normalized to the saturation magnetization ( $M_S$ ) at 1.4 T.

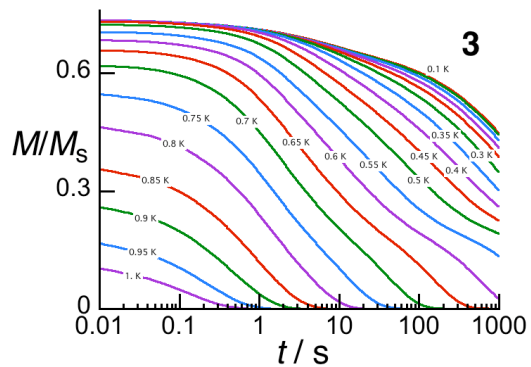

**Figure S3.** Relaxation of the magnetization of **3** at different temperatures. Data are normalized to the saturation magnetization ( $M_S$ ) at 1.4 T.

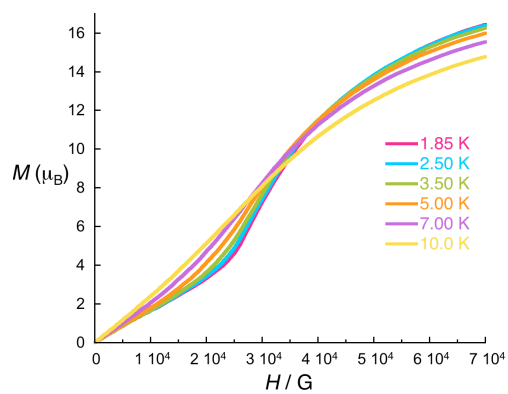

**Figure S4.** Magnetization vs dc magnetic field data on a powder sample of **4** at increasing temperatures.

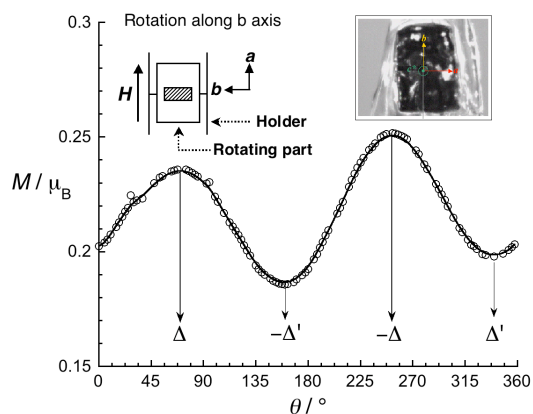

**Figure S5.** Rotation figure around the monoclinic magnetic  $b$  axis for a single crystal of **4** at 1000 Oe and 1.8 K.

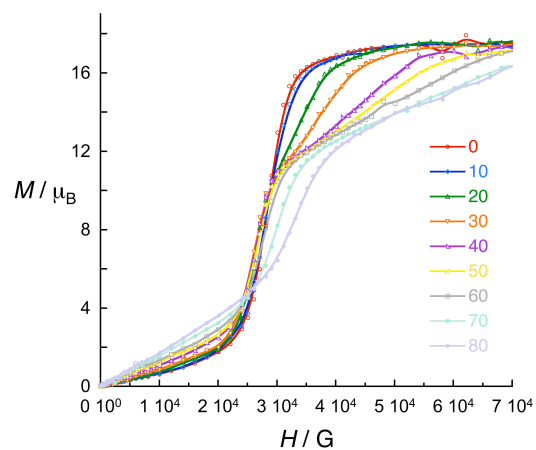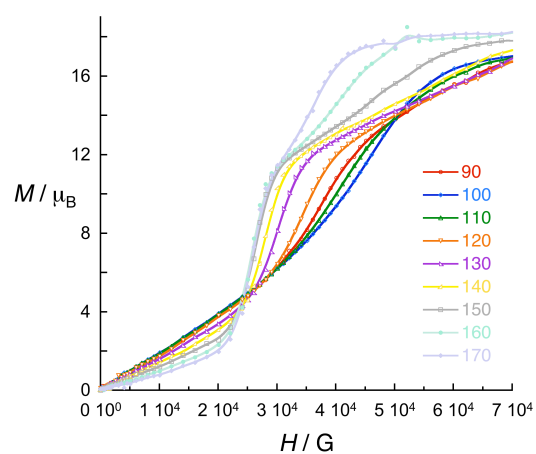

**Figure S6.** Magnetization vs. dc magnetic field data for various orientations ( $\square$ , defined in the text) of the applied field in the  $(b, \Delta)$  plane perpendicular to  $\Delta'$  hard axis of a single crystal of **4** at 1.8 K.

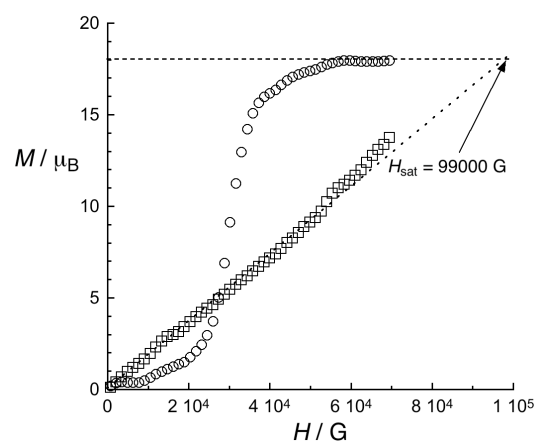

**Figure S7.** Magnetization vs. dc magnetic field data in the easy and hard directions for a single crystal of **5** at 1.85 K. Extrapolation of the hard direction data to the saturation value of  $18 \mu_B$  gives a saturation field  $H_{\text{sat}}$  of 9.9 T.

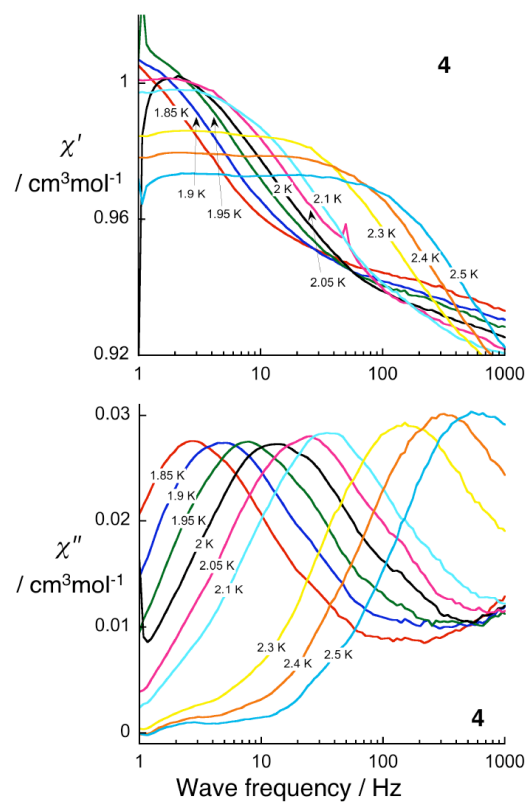

**Figure S8.** Frequency dependence of the real (top) and imaginary (bottom) ac susceptibilities of **4** at various temperatures.

**Analytical expression used for the fitting of temperature dependent magnetic properties of [Mn<sub>4</sub>].**

Van Vleck expression of the susceptibility:

$$\chi_{tetra} = \frac{\sum S_T(S_T + 1)(2S_T + 1)\exp(-E(S_T)/k_B T)}{\sum (2S_T + 1)\exp(-E(S_T)/k_B T)}$$

with

$$E(S_T) = \sum J_{wb} [S_T(S_T + 1) \sum S_A(S_A + 1) \sum S_B(S_B + 1)] \sum J_{bb} [S_A(S_A + 1)]$$

and

| <i>S</i> | <i>S<sub>T</sub></i> | <i>S<sub>B</sub></i> | <i>S<sub>A</sub></i> | <i>J<sub>bb</sub></i> | <i>J<sub>wb</sub></i> | Numerator | Denominator |
|----------|----------------------|----------------------|----------------------|-----------------------|-----------------------|-----------|-------------|
| 9        | 9                    | 5                    | 4                    | 40                    | 20                    | 1710      | 19          |
| 8        | 8                    | 5                    | 4                    | 22                    | 20                    | 1224      | 17          |
| 8        | 8                    | 5                    | 3                    | 30                    | 12                    | 1224      | 17          |
| 8        | 8                    | 4                    | 4                    | 32                    | 20                    | 1224      | 17          |
| 7        | 7                    | 5                    | 4                    | 6                     | 20                    | 840       | 15          |
| 7        | 7                    | 5                    | 3                    | 14                    | 12                    | 840       | 15          |
| 7        | 7                    | 5                    | 2                    | 20                    | 60                    | 840       | 15          |
| 7        | 7                    | 4                    | 4                    | 16                    | 20                    | 840       | 15          |
| 7        | 7                    | 4                    | 3                    | 24                    | 12                    | 840       | 15          |
| 7        | 7                    | 3                    | 4                    | 24                    | 20                    | 840       | 15          |
| 6        | 6                    | 5                    | 4                    | -8                    | 20                    | 546       | 13          |
| 6        | 6                    | 5                    | 3                    | 0                     | 12                    | 546       | 13          |
| 6        | 6                    | 5                    | 2                    | 6                     | 6                     | 546       | 13          |
| 6        | 6                    | 5                    | 1                    | 10                    | 2                     | 546       | 13          |
| 6        | 6                    | 4                    | 4                    | 2                     | 20                    | 546       | 13          |
| 6        | 6                    | 4                    | 3                    | 10                    | 12                    | 546       | 13          |
| 6        | 6                    | 4                    | 2                    | 16                    | 6                     | 546       | 13          |
| 6        | 6                    | 3                    | 4                    | 10                    | 20                    | 546       | 13          |
| 6        | 6                    | 3                    | 3                    | 18                    | 12                    | 546       | 13          |
| 6        | 6                    | 2                    | 4                    | 16                    | 20                    | 546       | 13          |
| 5        | 5                    | 5                    | 4                    | -20                   | 20                    | 330       | 11          |
| 5        | 5                    | 5                    | 3                    | -12                   | 12                    | 330       | 11          |
| 5        | 5                    | 5                    | 2                    | -6                    | 6                     | 330       | 11          |
| 5        | 5                    | 5                    | 1                    | -2                    | 2                     | 330       | 11          |
| 5        | 5                    | 5                    | 0                    | 0                     | 0                     | 330       | 11          |
| 5        | 5                    | 4                    | 4                    | -10                   | 20                    | 330       | 11          |
| 5        | 5                    | 4                    | 3                    | -2                    | 12                    | 330       | 11          |
| 5        | 5                    | 4                    | 2                    | 4                     | 6                     | 330       | 11          |
| 5        | 5                    | 4                    | 1                    | 8                     | 2                     | 330       | 11          |

|   |   |   |   |     |    |     |    |
|---|---|---|---|-----|----|-----|----|
| 5 | 5 | 3 | 4 | -2  | 20 | 330 | 11 |
| 5 | 5 | 3 | 3 | 6   | 12 | 330 | 11 |
| 5 | 5 | 3 | 2 | 12  | 6  | 330 | 11 |
| 5 | 5 | 2 | 4 | 4   | 20 | 330 | 11 |
| 5 | 5 | 2 | 3 | 12  | 12 | 330 | 11 |
| 5 | 5 | 1 | 4 | 8   | 20 | 330 | 11 |
| 4 | 4 | 5 | 4 | -30 | 20 | 180 | 9  |
| 4 | 4 | 5 | 3 | -22 | 12 | 180 | 9  |
| 4 | 4 | 5 | 2 | -16 | 6  | 180 | 9  |
| 4 | 4 | 5 | 1 | -12 | 2  | 180 | 9  |
| 4 | 4 | 4 | 4 | -20 | 20 | 180 | 9  |
| 4 | 4 | 4 | 3 | -12 | 12 | 180 | 9  |
| 4 | 4 | 4 | 2 | -6  | 6  | 180 | 9  |
| 4 | 4 | 4 | 1 | -2  | 2  | 180 | 9  |
| 4 | 4 | 4 | 0 | 0   | 0  | 180 | 9  |
| 4 | 4 | 3 | 4 | -12 | 20 | 180 | 9  |
| 4 | 4 | 3 | 3 | -4  | 12 | 180 | 9  |
| 4 | 4 | 3 | 2 | 2   | 6  | 180 | 9  |
| 4 | 4 | 3 | 1 | 6   | 2  | 180 | 9  |
| 4 | 4 | 2 | 4 | -6  | 20 | 180 | 9  |
| 4 | 4 | 2 | 3 | 2   | 12 | 180 | 9  |
| 4 | 4 | 2 | 2 | 8   | 6  | 180 | 9  |
| 4 | 4 | 1 | 4 | -2  | 20 | 180 | 9  |
| 4 | 4 | 1 | 3 | 6   | 12 | 180 | 9  |
| 4 | 4 | 0 | 4 | 0   | 20 | 180 | 9  |
| 3 | 3 | 5 | 4 | -38 | 20 | 84  | 7  |
| 3 | 3 | 5 | 3 | -30 | 12 | 84  | 7  |
| 3 | 3 | 5 | 2 | -24 | 6  | 84  | 7  |
| 3 | 3 | 4 | 4 | -28 | 20 | 84  | 7  |
| 3 | 3 | 4 | 3 | -20 | 12 | 84  | 7  |
| 3 | 3 | 4 | 2 | -14 | 6  | 84  | 7  |
| 3 | 3 | 4 | 1 | -10 | 2  | 84  | 7  |
| 3 | 3 | 3 | 4 | -20 | 20 | 84  | 7  |
| 3 | 3 | 3 | 3 | -12 | 12 | 84  | 7  |
| 3 | 3 | 3 | 2 | -6  | 6  | 84  | 7  |
| 3 | 3 | 3 | 1 | -2  | 2  | 84  | 7  |
| 3 | 3 | 3 | 0 | 0   | 0  | 84  | 7  |
| 3 | 3 | 2 | 4 | -14 | 20 | 84  | 7  |
| 3 | 3 | 2 | 3 | -12 | 12 | 84  | 7  |
| 3 | 3 | 2 | 2 | 0   | 6  | 84  | 7  |
| 3 | 3 | 2 | 1 | 4   | 2  | 84  | 7  |
| 3 | 3 | 1 | 4 | -10 | 20 | 84  | 7  |
| 3 | 3 | 1 | 3 | -2  | 12 | 84  | 7  |
| 3 | 3 | 1 | 2 | 4   | 6  | 84  | 7  |
| 3 | 3 | 0 | 3 | 0   | 12 | 84  | 7  |
| 2 | 2 | 5 | 4 | -44 | 20 | 30  | 5  |
| 2 | 2 | 5 | 3 | -36 | 12 | 30  | 5  |
| 2 | 2 | 4 | 4 | -34 | 20 | 30  | 5  |
| 2 | 2 | 4 | 3 | -26 | 12 | 30  | 5  |
| 2 | 2 | 4 | 2 | -20 | 6  | 30  | 5  |

|   |   |   |   |     |    |    |   |
|---|---|---|---|-----|----|----|---|
| 2 | 2 | 3 | 4 | -26 | 20 | 30 | 5 |
| 2 | 2 | 3 | 3 | -18 | 12 | 30 | 5 |
| 2 | 2 | 3 | 2 | -12 | 6  | 30 | 5 |
| 2 | 2 | 3 | 1 | -8  | 2  | 30 | 5 |
| 2 | 2 | 2 | 4 | -20 | 20 | 30 | 5 |
| 2 | 2 | 2 | 3 | -12 | 12 | 30 | 5 |
| 2 | 2 | 2 | 2 | -6  | 6  | 30 | 5 |
| 2 | 2 | 2 | 1 | -2  | 2  | 30 | 5 |
| 2 | 2 | 2 | 0 | 0   | 0  | 30 | 5 |
| 2 | 2 | 1 | 3 | -8  | 12 | 30 | 5 |
| 2 | 2 | 1 | 2 | -2  | 6  | 30 | 5 |
| 2 | 2 | 1 | 1 | 2   | 2  | 30 | 5 |
| 2 | 2 | 0 | 2 | 0   | 6  | 30 | 5 |
| 1 | 1 | 5 | 4 | -48 | 20 | 6  | 3 |
| 1 | 1 | 4 | 4 | -38 | 20 | 6  | 3 |
| 1 | 1 | 4 | 3 | -30 | 12 | 6  | 3 |
| 1 | 1 | 3 | 4 | -30 | 20 | 6  | 3 |
| 1 | 1 | 3 | 3 | -22 | 12 | 6  | 3 |
| 1 | 1 | 3 | 2 | -16 | 6  | 6  | 3 |
| 1 | 1 | 2 | 3 | -16 | 12 | 6  | 3 |
| 1 | 1 | 2 | 2 | -10 | 6  | 6  | 3 |
| 1 | 1 | 2 | 1 | -6  | 2  | 6  | 3 |
| 1 | 1 | 1 | 2 | -6  | 6  | 6  | 3 |
| 1 | 1 | 1 | 1 | -2  | 2  | 6  | 3 |
| 1 | 1 | 1 | 0 | 0   | 0  | 6  | 3 |
| 1 | 1 | 0 | 1 | 0   | 2  | 6  | 3 |
| 0 | 0 | 4 | 4 | -40 | 20 | 0  | 1 |
| 0 | 0 | 3 | 3 | -24 | 12 | 0  | 1 |
| 0 | 0 | 2 | 2 | -12 | 6  | 0  | 1 |
| 0 | 0 | 1 | 1 | -4  | 2  | 0  | 1 |
| 0 | 0 | 0 | 0 | 0   | 0  | 0  | 1 |
